# Supplementary material for: Substitution reactivity and structural variability induced by tryptamine on the biomimetic rhenium tricarbonyl complex
Source: Royal Society of Chemistry journal article supplement (doi:10.1039/d1ra03750a), 2021-01-01
Supplement: d1ra03750a1.pdf [file d1ra03750a1.pdf]

## Supporting information

### **Substitution reactivity and structural variability induced by tryptamine on the biomimetic rhenium tricarbonyl complex.**

*Frederick J. F. Jacobs<sup>a</sup> Gertruida J. S. Venter,<sup>a</sup> Eleanor Fourie,<sup>a</sup> R. E. Kroon<sup>b</sup> and Alice Brink<sup>a\*</sup>*

---

<sup>a</sup>Department of Chemistry, University of the Free State, PO Box 339, Bloemfontein 9300, South Africa.

<sup>b</sup>Department of Physics, University of the Free State, Bloemfontein 9300, South Africa.

\* Corresponding author email: [brinka@ufs.ac.za](mailto:brinka@ufs.ac.za)

**SUPPLEMENTARY DATA FOR THE SUBSTITUTION OF METHANOL IN THE  $[\text{Re}(\text{CO})_3(5\text{Me-Sal-Tryptamine})(\text{MeOH})]$  COMPLEX.**

**Table SI.1: (Figure 5) Temperature and [Py] dependence of the pseudo first-order rate constant for the formation of  $[\text{Re}(\text{CO})_3(5\text{Me-Sal-Tryptamine})(\text{Py})]$  in methanol ( $\lambda = 380\text{nm}$ ) with  $[\text{Re}(\text{CO})_3(5\text{Me-Sal-Tryptamine})(\text{MeOH})] = 4 \times 10^{-4} \text{ M}$ .**

| [Py] (M) | $k_{\text{obs}}$ at 5°C<br>( $\text{s}^{-1}$ ) | $k_{\text{obs}}$ at 15.4°C<br>( $\text{s}^{-1}$ ) | $k_{\text{obs}}$ at 25.3°C<br>( $\text{s}^{-1}$ ) |
|----------|------------------------------------------------|---------------------------------------------------|---------------------------------------------------|
| 0.009    | $0.00221 \pm 0.00002$                          | $0.0080 \pm 0.0001$                               | $0.0241 \pm 0.0001$                               |
| 0.024    | $0.00337 \pm 0.00003$                          | $0.0169 \pm 0.0002$                               | $0.0510 \pm 0.0004$                               |
| 0.033    | $0.00396 \pm 0.00004$                          | $0.0231 \pm 0.0002$                               | $0.0707 \pm 0.0004$                               |
| 0.048    | $0.00638 \pm 0.00009$                          | $0.0312 \pm 0.0003$                               | $0.0975 \pm 0.0007$                               |
| 0.072    | $0.0111 \pm 0.0005$                            | $0.0486 \pm 0.0005$                               | $0.148 \pm 0.001$                                 |
| 0.095    | $0.0145 \pm 0.0006$                            | $0.062 \pm 0.001$                                 | $0.199 \pm 0.002$                                 |

**Table SI.2: (Figure SI.1) Temperature and [Imi] dependence of the pseudo first-order rate constant for the formation of  $[\text{Re}(\text{CO})_3(5\text{Me-Sal-Tryptamine})(\text{Imi})]$  in methanol ( $\lambda = 380\text{nm}$ ) with  $[\text{Re}(\text{CO})_3(5\text{Me-Sal-Tryptamine})(\text{MeOH})] = 4 \times 10^{-4} \text{ M}$ .**

| [Imi] (M) | $k_{\text{obs}}$ at 5°C<br>( $\text{s}^{-1}$ ) | $k_{\text{obs}}$ at 15.6°C<br>( $\text{s}^{-1}$ ) | $k_{\text{obs}}$ at 25.2°C<br>( $\text{s}^{-1}$ ) |
|-----------|------------------------------------------------|---------------------------------------------------|---------------------------------------------------|
| 0.010     | $0.00184 \pm 0.00002$                          | $0.0082 \pm 0.0001$                               | $0.0312 \pm 0.0003$                               |
| 0.025     | $0.0046 \pm 0.0001$                            | $0.0202 \pm 0.0003$                               | $0.0478 \pm 0.0005$                               |
| 0.035     | $0.0063 \pm 0.0002$                            | $0.0233 \pm 0.0003$                               | $0.0672 \pm 0.0009$                               |
| 0.050     | $0.0092 \pm 0.0006$                            | $0.0334 \pm 0.0005$                               | $0.088 \pm 0.002$                                 |
| 0.076     | $0.016 \pm 0.004$                              | $0.0473 \pm 0.0006$                               | $0.132 \pm 0.005$                                 |
| 0.100     | -                                              | $0.067 \pm 0.001$                                 | $0.179 \pm 0.002$                                 |

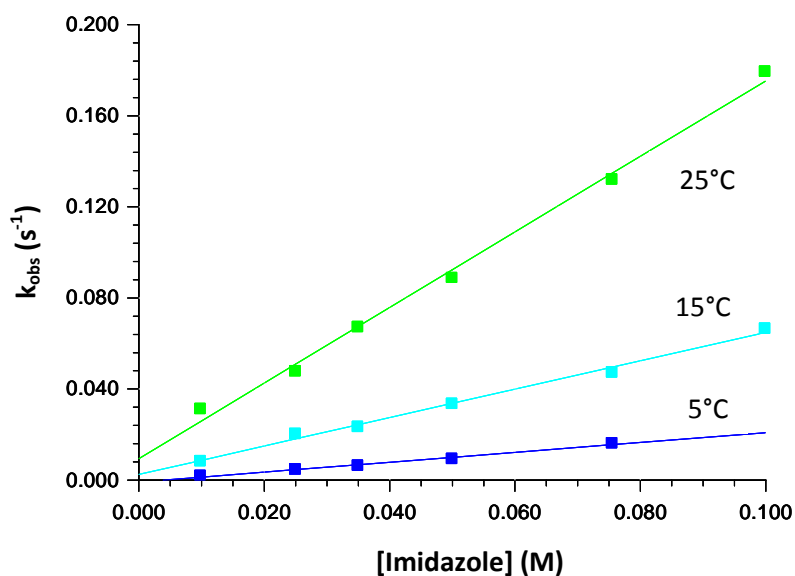

**Figure SI.1:  $k_{\text{obs}}$  versus [imidazole] for the reaction of *fac*- $[\text{Re}(\text{CO})_3(5\text{Me-Sal-Tryptamine})(\text{MeOH})]$  and imidazole at different temperatures with  $[\text{Re complex}] = 4 \times 10^{-4} \text{ M}$  and  $[\text{imidazole}] = 0.01 \text{ M} - 0.10 \text{ M}$  collected at 380nm in methanol.**

**Table SI.3: Temperature and [DMAP] dependence of the pseudo first-order rate constant for the formation of [Re(CO)<sub>3</sub>(5Me-Sal-Tryptamine)(DMAP)] in methanol ( $\lambda = 380\text{nm}$ ) with [Re(CO)<sub>3</sub>(5Me-Sal-Tryptamine)(MeOH)] =  $4 \times 10^{-4}$  M. (Using linear kinetic calculations)**

| [DMAP]<br>(M) | $k_{\text{obs}}$ at 6.1°C<br>(s <sup>-1</sup> ) | $k_{\text{obs}}$ at 15.0°C<br>(s <sup>-1</sup> ) | $k_{\text{obs}}$ at 25.0°C<br>(s <sup>-1</sup> ) |
|---------------|-------------------------------------------------|--------------------------------------------------|--------------------------------------------------|
| 0.010         | 0.00634 ± 0.00009                               | 0.0183 ± 0.0003                                  | 0.0311 ± 0.0003                                  |
| 0.025         | 0.0154 ± 0.0002                                 | 0.0393 ± 0.0005                                  | 0.0710 ± 0.0008                                  |
| 0.033         | 0.0158 ± 0.0002                                 | 0.0530 ± 0.0007                                  | 0.0924 ± 0.0009                                  |
| 0.050         | 0.0315 ± 0.0004                                 | 0.0700 ± 0.001                                   | 0.152 ± 0.001                                    |
| 0.075         | -                                               | -                                                | 0.225 ± 0.003                                    |
| 0.100         | -                                               | -                                                | 0.316 ± 0.003                                    |

**Table SI.4: (Figure 6) Temperature and [DMAP] dependence of the pseudo first-order rate constant for the formation of [Re(CO)<sub>3</sub>(5Me-Sal-Tryptamine)(DMAP)] in methanol ( $\lambda = 380\text{nm}$ ) with [Re(CO)<sub>3</sub>(5Me-Sal-Tryptamine)(MeOH)] =  $4 \times 10^{-4}$  M. (Using limiting kinetic calculations over a 2 order of magnitude concentration range.)**

| [DMAP]<br>(M) | $k_{\text{obs}}$ at 5.0°C<br>(s <sup>-1</sup> ) | $k_{\text{obs}}$ at 15.1°C<br>(s <sup>-1</sup> ) | $k_{\text{obs}}$ at 25.0°C<br>(s <sup>-1</sup> ) |
|---------------|-------------------------------------------------|--------------------------------------------------|--------------------------------------------------|
| 0.010         | 0.0074 ± 0.0001                                 | 0.0102 ± 0.0001                                  | 0.0311 ± 0.0003                                  |
| 0.025         | 0.0162 ± 0.0001                                 | 0.0255 ± 0.0002                                  | 0.0710 ± 0.0008                                  |
| 0.035         | 0.0217 ± 0.0002                                 | 0.0373 ± 0.0003                                  | 0.0924 ± 0.0009                                  |
| 0.050         | 0.0308 ± 0.0002                                 | 0.0486 ± 0.0004                                  | 0.152 ± 0.001                                    |
| 0.075         | 0.0434 ± 0.0004                                 | 0.0724 ± 0.0006                                  | 0.225 ± 0.003                                    |
| 0.100         | 0.0518 ± 0.0006                                 | 0.0910 ± 0.0009                                  | 0.316 ± 0.003                                    |
| 0.250         | 0.107 ± 0.002                                   | 0.173 ± 0.002                                    | 0.542 ± 0.006                                    |
| 0.399         | -                                               | -                                                | 0.69 ± 0.01                                      |
| 0.400         | 0.136 ± 0.003                                   | 0.231 ± 0.002                                    | -                                                |
| 0.500         | 0.164 ± 0.003                                   | 0.248 ± 0.003                                    | -                                                |
| 0.762         | -                                               | -                                                | 0.85 ± 0.06                                      |

**Table SI.5: (Figure SI.2) Temperature and [PPh<sub>3</sub>] dependence of the pseudo first-order rate constant for the formation of [Re(CO)<sub>3</sub>(5Me-Sal-Tryptamine)(PPh<sub>3</sub>)] in methanol ( $\lambda = 380\text{nm}$ ) with [Re(CO)<sub>3</sub>(5Me-Sal-Tryptamine)(MeOH)] =  $4 \times 10^{-4}$  M.**

| [PPh <sub>3</sub> ]<br>(M) | $k_{\text{obs}}$ at 5°C<br>(s <sup>-1</sup> ) | $k_{\text{obs}}$ at 15.4°C<br>(s <sup>-1</sup> ) | $k_{\text{obs}}$ at 25.3°C<br>(s <sup>-1</sup> ) |
|----------------------------|-----------------------------------------------|--------------------------------------------------|--------------------------------------------------|
| 0.002                      | 0.001221 ± 0.000005                           | 0.00824 ± 0.00007                                | 0.0136 ± 0.0002                                  |
| 0.004                      | 0.00131 ± 0.00001                             | 0.01063 ± 0.00008                                | 0.0154 ± 0.0002                                  |
| 0.008                      | 0.00323 ± 0.00003                             | 0.01490 ± 0.00005                                | 0.0311 ± 0.0002                                  |
| 0.010                      | 0.0049 ± 0.0001                               | 0.0201 ± 0.0001                                  | 0.0422 ± 0.0002                                  |
| 0.025                      | 0.0103 ± 0.0003                               | 0.0462 ± 0.0003                                  | 0.1045 ± 0.0009                                  |
| 0.035                      | -                                             | 0.0699 ± 0.0006                                  | 0.159 ± 0.002                                    |

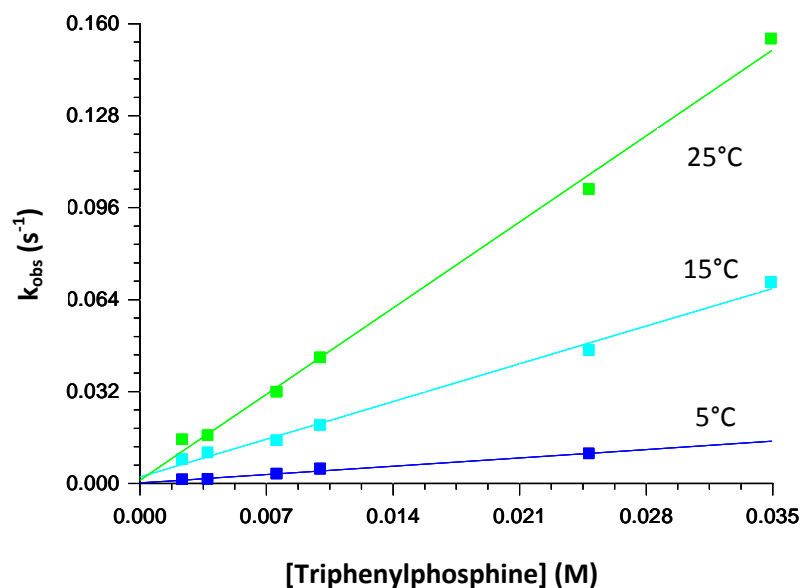

Figure SI.2:  $k_{\text{obs}}$  versus [Triphenylphosphine] for the reaction between *fac*-[Re(CO)<sub>3</sub>(5Me-Sal-Tryptamine)(MeOH)] and triphenylphosphine at different temperatures with the [Re complex] =  $4 \times 10^{-4}$  M and [Triphenylphosphine] = 0.001 M – 0.035 M collected at 380nm in methanol.

Table SI.6: Eyring plots (from Equation 2) of the  $k_1$  rate constants for the formation of [Re(CO)<sub>3</sub>(5Me-Sal-Tryptamine)(L)] (where L = Py, Imi, DMAP and PPh<sub>3</sub>) in methanol.

| Pyridine                          |                          |
|-----------------------------------|--------------------------|
| $1/T \text{ (x } 10^{-3}\text{)}$ | $\text{Ln}(k_1/T)$       |
| $3.597 \pm 0.001$                 | $-7.868943 \pm 0.000008$ |
| $3.4674 \pm 0.0001$               | $-6.113573 \pm 0.000006$ |
| $3.3523 \pm 0.0001$               | $-4.98564 \pm 0.00002$   |

| Imidazole                         |                          |
|-----------------------------------|--------------------------|
| $1/T \text{ (x } 10^{-3}\text{)}$ | $\text{Ln}(k_1/T)$       |
| $3.597 \pm 0.001$                 | $-7.156986 \pm 0.000007$ |
| $3.4650 \pm 0.0001$               | $-6.13561 \pm 0.00001$   |
| $3.3535 \pm 0.0001$               | $-5.19088 \pm 0.00004$   |

| DMAP (Calculated from limiting traces) |                    |
|----------------------------------------|--------------------|
| $1/T \text{ (x } 10^{-3}\text{)}$      | $\text{Ln}(k_1/T)$ |
| $3.581 \pm 0.001$                      | $-6.3 \pm 0.6$     |
| $3.4704 \pm 0.0001$                    | $-5.6 \pm 0.3$     |
| $3.3540 \pm 0.0001$                    | $-4.2 \pm 0.1$     |

| DMAP (Calculated from linear traces) |                    |
|--------------------------------------|--------------------|
| $1/T \text{ (x } 10^{-3}\text{)}$    | $\text{Ln}(k_1/T)$ |
| $3.581 \pm 0.001$                    | $-6.392 \pm 0.001$ |
| $3.4704 \pm 0.0001$                  | $-5.83 \pm 0.01$   |
| $3.3540 \pm 0.0001$                  | $-4.54 \pm 0.02$   |

| Triphenylphosphine        |                       |
|---------------------------|-----------------------|
| 1/T (x 10 <sup>-3</sup> ) | Ln(k <sub>1</sub> /T) |
| 3.597 ± 0.001             | -6.50720 ± 0.00001    |
| 3.4650 ± 0.0001           | -5.03646 ± 0.00005    |
| 3.3546 ± 0.0001           | -4.27860 ± 0.00009    |

Table SI.7: (Figure 9) Data for the plot of  $k_{obs}$  versus [Pyridine] (0.01 – 0.40 M) for *fac*-[Re(CO)<sub>3</sub>(R-Sal-T)(MeOH)] (where R = H, CH<sub>3</sub> and T = *m*-toluidine, *p*-toluidine, phenylimine, 3-methylbutylimine, cyclohexylimine and tryptimine where  $\lambda$  = 440, 436, 441, 416, 417 and 380 nm respectively) complexes substituted with pyridine in methanol at 25°C.

| Re-Salen-mTol |                              |  | Re-Salen-3MeBu |                              |  | Re-Salen-Cy |                              |
|---------------|------------------------------|--|----------------|------------------------------|--|-------------|------------------------------|
| [Py] (M)      | $k_{obs}$ (s <sup>-1</sup> ) |  | [Py] (M)       | $k_{obs}$ (s <sup>-1</sup> ) |  | [Py] (M)    | $k_{obs}$ (s <sup>-1</sup> ) |
| 0.050         | 0.076 ± 0.001                |  | 0.030          | 0.0473 ± 0.0009              |  | 0.025       | 0.077 ± 0.003                |
| 0.100         | 0.150 ± 0.002                |  | 0.041          | 0.081 ± 0.001                |  | 0.040       | 0.115 ± 0.003                |
| 0.200         | 0.282 ± 0.004                |  | 0.050          | 0.102 ± 0.001                |  | 0.050       | 0.147 ± 0.005                |
| 0.300         | 0.406 ± 0.007                |  | 0.200          | 0.370 ± 0.004                |  | 0.200       | 0.57 ± 0.01                  |
| 0.400         | 0.54 ± 0.01                  |  | 0.300          | 0.543 ± 0.007                |  | 0.300       | 0.82 ± 0.02                  |
| -             | -                            |  | 0.400          | 0.72 ± 0.01                  |  | 0.400       | 0.99 ± 0.03                  |

| Re-Salen-Ph |                              |  | Re-Salen-pTol |                              |  | Re-SalH-Tryp |                              |
|-------------|------------------------------|--|---------------|------------------------------|--|--------------|------------------------------|
| [Py] (M)    | $k_{obs}$ (s <sup>-1</sup> ) |  | [Py] (M)      | $k_{obs}$ (s <sup>-1</sup> ) |  | [Py] (M)     | $k_{obs}$ (s <sup>-1</sup> ) |
| 0.025       | 0.0349 ± 0.0005              |  | 0.025         | 0.0394 ± 0.0006              |  | 0.009        | 0.0241 ± 0.0001              |
| 0.040       | 0.0576 ± 0.0009              |  | 0.040         | 0.0592 ± 0.0008              |  | 0.024        | 0.0510 ± 0.0004              |
| 0.050       | 0.072 ± 0.001                |  | 0.050         | 0.074 ± 0.001                |  | 0.033        | 0.0707 ± 0.0004              |
| 0.200       | 0.253 ± 0.006                |  | 0.200         | 0.281 ± 0.004                |  | 0.048        | 0.0975 ± 0.0007              |
| 0.300       | 0.393 ± 0.006                |  | 0.300         | 0.422 ± 0.005                |  | 0.072        | 0.148 ± 0.001                |
| 0.400       | 0.505 ± 0.009                |  | 0.400         | 0.562 ± 0.009                |  | 0.095        | 0.199 ± 0.002                |
| -           | -                            |  | -             | -                            |  | 0.397        | 0.82 ± 0.01                  |

**Table SI.8: (Figure SI.3) Data for the plot of  $k_{\text{obs}}$  versus [DMAP] (0.01 – 0.40 M) for *fac*-[Re(CO)<sub>3</sub>(R-Sal-T)(MeOH)] (where R = H, CH<sub>3</sub> and T = *m*-toluidine, *p*-toluidine, phenylimine, 3-methylbutylimine, cyclohexylimine and tryptimine where  $\lambda$  = 440, 436, 441, 416, 417 and 380 nm respectively) complexes substituted with DMAP in methanol at 25°C.**

| Re-Salen-mTol |                                     |  | Re-Salen-3MeBu |                                     |  | Re-Salen-Cy |                                     |
|---------------|-------------------------------------|--|----------------|-------------------------------------|--|-------------|-------------------------------------|
| [DMAP] (M)    | $k_{\text{obs}}$ (s <sup>-1</sup> ) |  | [DMAP] (M)     | $k_{\text{obs}}$ (s <sup>-1</sup> ) |  | [DMAP] (M)  | $k_{\text{obs}}$ (s <sup>-1</sup> ) |
| 0.043         | 0.089 ± 0.001                       |  | 0.028          | 0.074 ± 0.001                       |  | 0.026       | 0.097 ± 0.003                       |
| 0.050         | 0.102 ± 0.001                       |  | 0.042          | 0.11 ± 0.02                         |  | 0.043       | 0.152 ± 0.003                       |
| 0.102         | 0.193 ± 0.003                       |  | 0.051          | 0.136 ± 0.002                       |  | 0.054       | 0.199 ± 0.005                       |
| 0.202         | 0.312 ± 0.005                       |  | 0.206          | 0.458 ± 0.009                       |  | 0.191       | 0.51 ± 0.01                         |
| 0.290         | 0.402 ± 0.008                       |  | 0.302          | 0.56 ± 0.02                         |  | 0.308       | 0.75 ± 0.02                         |
| 0.399         | 0.49 ± 0.01                         |  | 0.418          | 0.66 ± 0.02                         |  | 0.394       | 0.89 ± 0.03                         |
| 0.568         | 0.59 ± 0.01                         |  | -              | -                                   |  | -           | -                                   |
| 0.786         | 0.69 ± 0.01                         |  | -              | -                                   |  | -           | -                                   |

| Re-Salen-Ph |                                     |  | Re-Salen-pTol |                                     |  | Re-SalH-Tryp |                                     |
|-------------|-------------------------------------|--|---------------|-------------------------------------|--|--------------|-------------------------------------|
| [DMAP] (M)  | $k_{\text{obs}}$ (s <sup>-1</sup> ) |  | [DMAP] (M)    | $k_{\text{obs}}$ (s <sup>-1</sup> ) |  | [DMAP] (M)   | $k_{\text{obs}}$ (s <sup>-1</sup> ) |
| 0.026       | 0.053 ± 0.001                       |  | 0.026         | 0.0520 ± 0.0009                     |  | 0.010        | 0.0311 ± 0.0003                     |
| 0.043       | 0.077 ± 0.001                       |  | 0.043         | 0.086 ± 0.001                       |  | 0.025        | 0.0710 ± 0.0008                     |
| 0.054       | 0.106 ± 0.002                       |  | 0.054         | 0.108 ± 0.002                       |  | 0.033        | 0.0924 ± 0.0009                     |
| 0.191       | 0.286 ± 0.008                       |  | 0.191         | 0.282 ± 0.006                       |  | 0.050        | 0.152 ± 0.001                       |
| 0.308       | 0.410 ± 0.009                       |  | 0.308         | 0.387 ± 0.007                       |  | 0.075        | 0.225 ± 0.003                       |
| 0.394       | 0.45 ± 0.01                         |  | 0.394         | 0.417 ± 0.009                       |  | 0.100        | 0.316 ± 0.003                       |
| -           | -                                   |  | -             | -                                   |  | 0.250        | 0.542 ± 0.006                       |
| -           | -                                   |  | -             | -                                   |  | 0.399        | 0.70 ± 0.01                         |
| -           | -                                   |  | -             | -                                   |  | 0.762        | 0.85 ± 0.06                         |

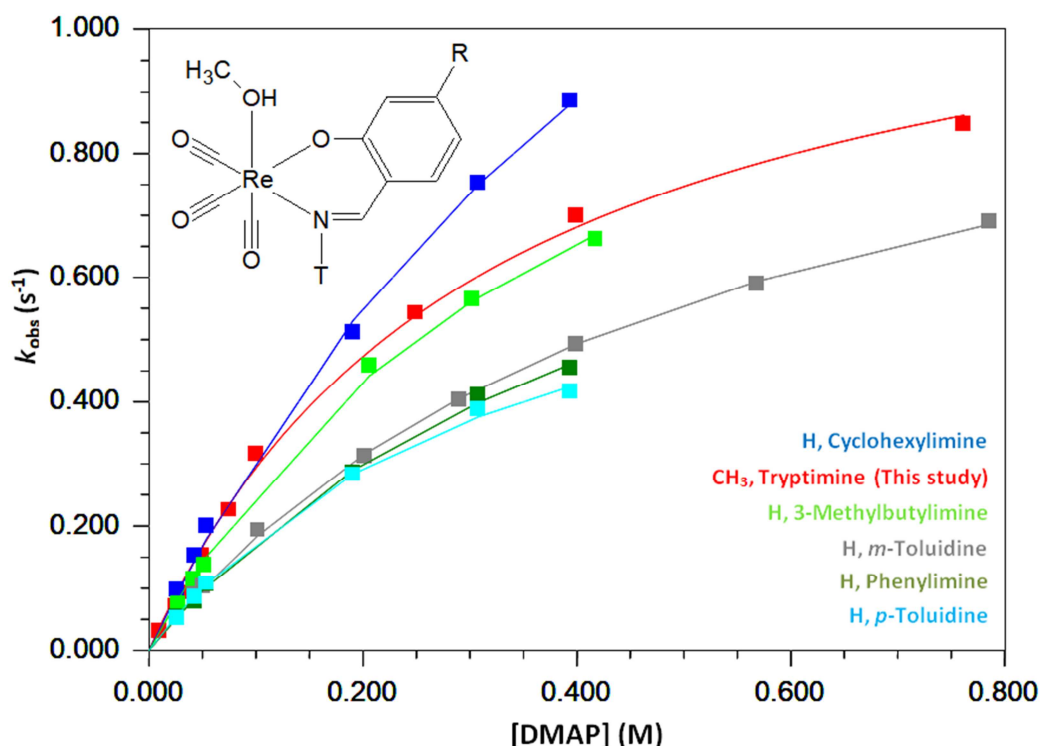

Figure SI.3: Plot of  $k_{obs}$  versus [DMAP] (0.01 – 0.40 M) for  $fac$ -[Re(CO)<sub>3</sub>(R-Sal-T)(MeOH)] complexes (where R = H, CH<sub>3</sub> and T = *m*-toluidine, *p*-toluidine, phenylimine, 3-methylbutylimine, cyclohexylimine and tryptimine;  $\lambda$  = 440, 436, 441, 416, 417 and 380 nm respectively) substituted with DMAP in methanol at 25°C.

Below is an excerpt from the paper titled: *Solid State Isostructural Behavior and Quantified Limiting Substitution Kinetics in Schiff-Base Bidentate Ligand Complexes  $fac$ -[Re(O,N-Bid)(CO)<sub>3</sub>(MeOH)]<sup>n</sup>*.<sup>1</sup> Utilized in the calculations of linear versus limiting kinetics.

Monitoring the kinetics at conditions where  $[L] \gg [Re]$ , with typical metal concentrations ranging from  $1 \times 10^{-4}$  to  $5 \times 10^{-4}$  M, yields the rate equation for this scheme as defined in eq 2 for limiting kinetics (i.e. interchange mechanisms)

$$k_{obs} = \frac{k_3 K_2 [L]}{(1 + K_2 [L]) + k_{-3}} \quad (2)$$

Here  $K_2$  is the pre-equilibrium constant,  $k_3$  the observed second-order limiting rate constant, and  $k_{-3}$  is the reverse reaction rate constant indicated by the graphical fits of  $k_{obs}$  versus ligand concentration.<sup>2, 3</sup> The substitution of methanol in the  $fac$ -[Re(L,L'-Bid)(CO)<sub>3</sub>(MeOH)] complexes for a range of entering ligands can also be defined by the overall equilibrium

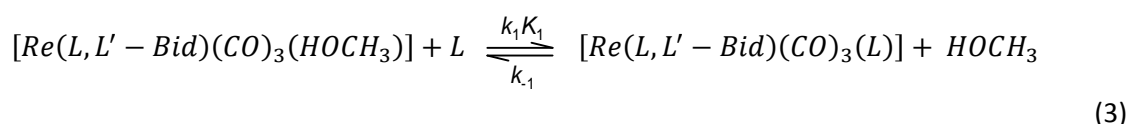

The pseudo-first-order rate constant was obtained from absorbance versus time data to determine the relationship for the profiles wherein linear dependences of  $k_{obs}$  versus [Ligand] were observed,

as described previously,<sup>20,21</sup> while the overall stability constant ( $K_1$ ) has been determined kinetically using the definition

$$K_1 = \frac{k_1}{k_{-1}} \quad (4)$$

The linear concentration dependence of the pseudo-first-order rate constant ( $k_{obs}$ ) assuming the overall equilibrium defined in eq 3 can be given determined from

$$k_{obs} = k_1[L] + k_{-1} \quad (5)$$

The overall rate equation (eq 5) will only be applicable at low ligand concentrations for the limiting mechanism before saturation limits have been reached, i.e., where linear second-order rate behavior occurs ( $k_f = k_1 = k_3K_2$ ). The total forward rate constant ( $k_f$ ) for an interchange mechanism will be similar to the overall second-order rate constant ( $k_1$ ) within experimental error provided that data from well before the plateau is realized are used. However, at high ligand concentrations, limiting kinetics will dominate, and  $k_f \neq k_1$ .

**End of excerpt. From the following reference:** <sup>1</sup>A. Brink, H. G. Visser and A. Roodt, *J. Inorg. Chem.*, 2014, **53**, 12480–12488.

**Table SI.9: UV-Vis kinetic data obtained from the  $k_{obs}$  vs ligand concentration plots for the substitution of methanol in *fac*-[Re(CO)<sub>3</sub>(5Me-Sal-Tryptamine)(MeOH)] by different ligands (L) at different temperatures in methanol when calculated with limiting kinetics traces.**

| Entering ligands (L)          | Temperature (°C) | $k_3$ (s <sup>-1</sup> ) | $K_2$ (M <sup>-1</sup> ) | $k_f = k_3K_2$ (M <sup>-1</sup> s <sup>-1</sup> ) |
|-------------------------------|------------------|--------------------------|--------------------------|---------------------------------------------------|
| Py <sup>1</sup>               | 5.0              | -0.05 ± 0.06             | -3 ± 2                   | 0.11 ± 0.18                                       |
|                               | 15.4             | 121 ± 18575              | 0.005 ± 0.81             | 0.6 ± 138                                         |
|                               | 25.3             | -1.9 ± 0.5               | -0.9 ± 0.2               | 1.8 ± 0.6                                         |
| Imi <sup>2</sup>              | 5.0              | -0.032 ± 0.007           | -4.3 ± 0.6               | 0.14 ± 0.03                                       |
|                               | 15.6             | -0.36 ± 0.39             | -1 ± 1                   | 0.5 ± 0.7                                         |
|                               | 25.2             | -0.6 ± 0.2               | -2.2 ± 0.5               | 1.3 ± 0.5                                         |
| DMAP <sup>3</sup>             | 6.1              | 0.78 ± 0.27              | 0.67 ± 0.26              | 0.2 ± 0.2                                         |
|                               | 15.0             | 0.33 ± 0.04              | 3.24 ± 0.79              | 0.9 ± 0.2                                         |
|                               | 25.0             | 1.19 ± 0.03              | 3.79 ± 0.35              | 3.7 ± 0.3                                         |
| PPh <sub>3</sub> <sup>4</sup> | 5.0              | 0.08 ± 0.06              | 6 ± 6                    | 0.5 ± 0.6                                         |
|                               | 15.4             | -0.15 ± 0.03             | -9 ± 1                   | 1.3 ± 0.3                                         |
|                               | 25.3             | -0.5 ± 0.2               | -7 ± 2                   | 3 ± 1                                             |

<sup>1</sup>Concentration range of [Py] = 0.01–0.10 M <sup>2</sup>[Imi] = 0.01–0.10 M <sup>3</sup>[DMAP] = 0.01–0.10 M <sup>4</sup>[PPh<sub>3</sub>] = 0.0025–0.0350 M.



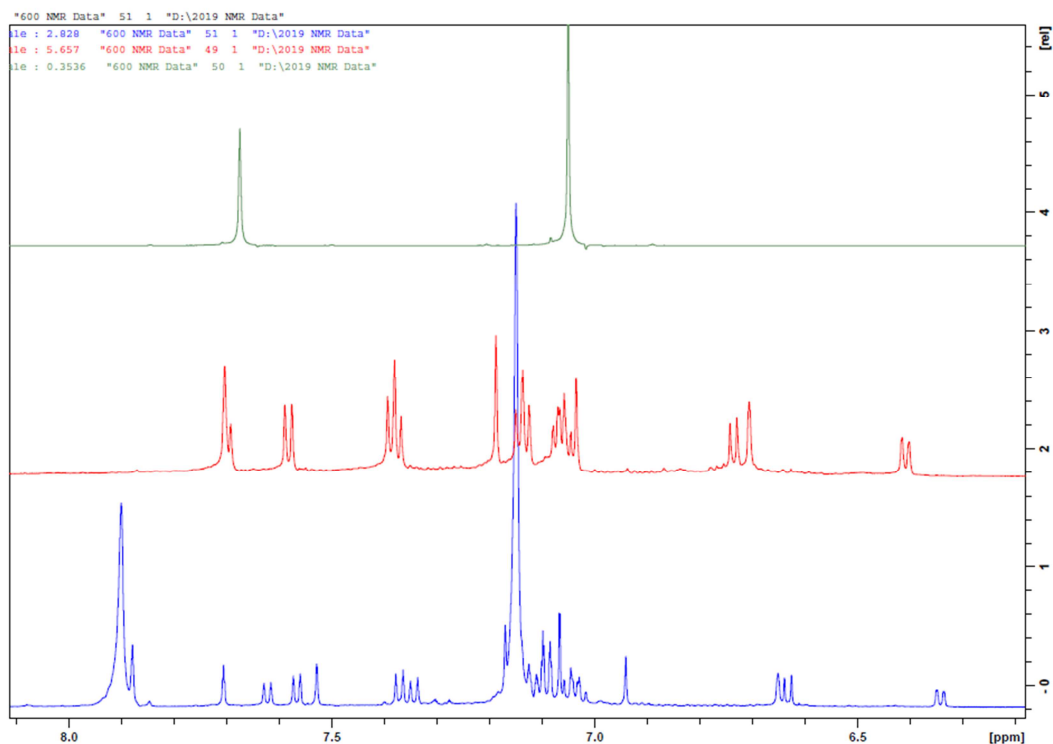

Figure SI.4: Aromatic region for the <sup>1</sup>H spectra of imidazole (green), *fac*-[Re(CO)<sub>3</sub>(5Me-SalH-Tryp)(MeOH)] (red) and *fac*-[Re(CO)<sub>3</sub>(5Me-SalH-Tryp)(Imidazole)] (blue) all in deuterated methanol. 2 equivalents excess of imidazole was added to the deuterated methanol-metal solution.

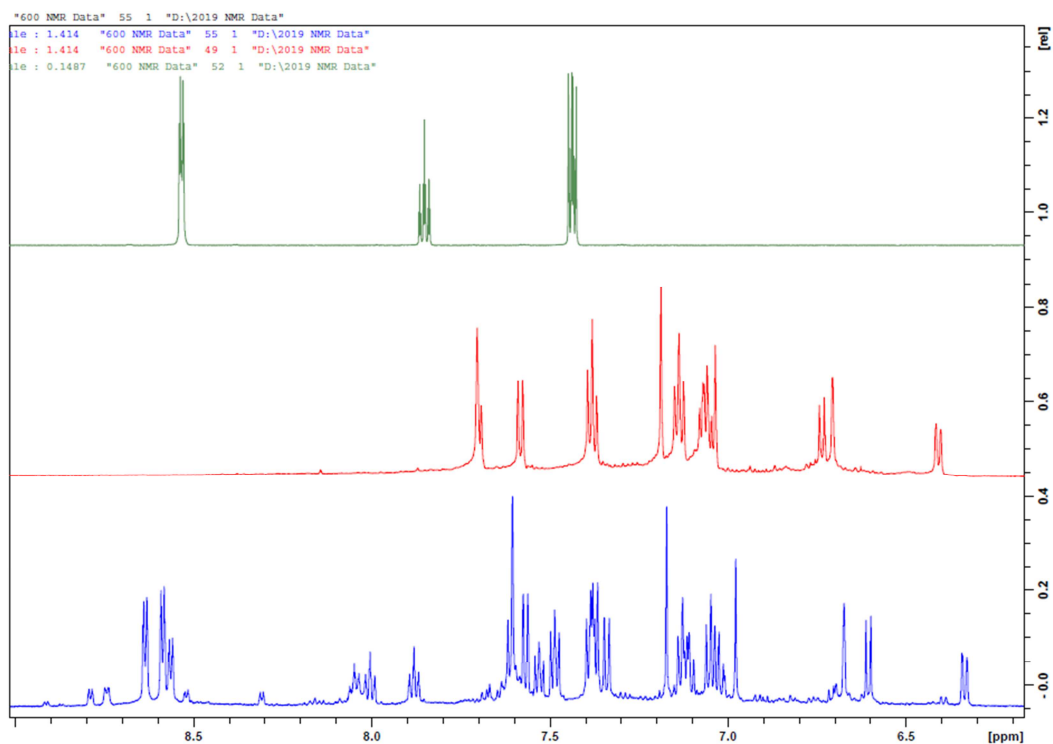

Figure SI.5: Aromatic region for the <sup>1</sup>H spectra of pyridine (green), *fac*-[Re(CO)<sub>3</sub>(5Me-SalH-Tryp)(MeOH)] (red) and *fac*-[Re(CO)<sub>3</sub>(5Me-SalH-Tryp)(Pyridine)] (blue) all in deuterated methanol. 2 equivalents excess of pyridine was added to the deuterated methanol-metal solution.

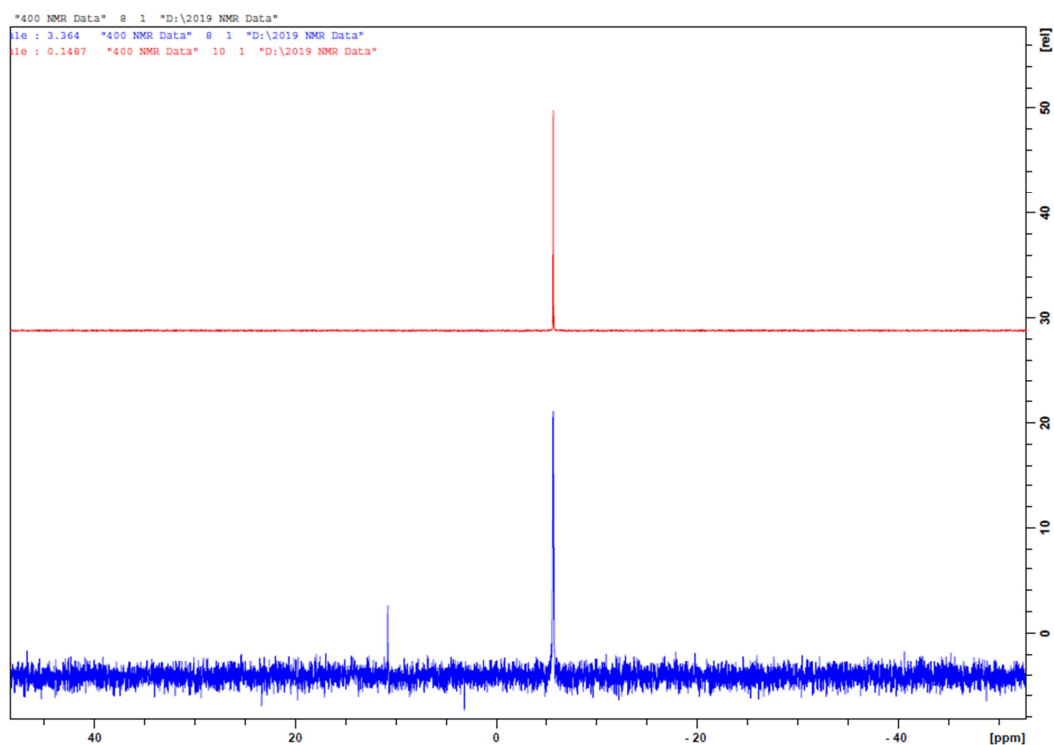

Figure S1.6: Full  $^{31}\text{P}$  spectra of triphenylphosphine (red) and *fac*-[Re(CO) $_3$ 5Me-SalH-Tryp](PPh $_3$ ) (blue) both in deuterated chloroform (PPh $_3$  has difficulty dissolving in methanol). 2 equivalents excess of PPh $_3$  was added to the deuterated chloroform-metal solution.

#### CELL TESTING:

Table S1. 9: The IC $_{50}$  values (the concentration needed, in  $\mu\text{M}$ , to inhibit 50% of the growth of cancer cells) of each of the seven compounds versus Cisplatin along with the standard error.

| Compound                                                    | IC $_{50}$   | Std err | IC $_{50}$   | Std err | IC $_{50}$   | Std err | Average     | Std err |
|-------------------------------------------------------------|--------------|---------|--------------|---------|--------------|---------|-------------|---------|
| <b>Cisplatin</b>                                            | <b>3.163</b> | 1.4     | <b>2.898</b> | 1.6     | <b>2.167</b> | 2.1     | <b>2.74</b> | 3.0     |
| 5MeSalH-Tryptamine <b>(1)</b>                               | <b>14.90</b> | 1.3     | <b>25.95</b> | 1.4     | <b>1.791</b> | 1.8     | <b>14.2</b> | 2.6     |
| <i>fac</i> -[Re(CO) $_3$ 5MeSal-Tryp(MeOH)] <b>(2)</b>      | <b>16.74</b> | 1.3     | <b>16.67</b> | 1.5     | <b>1.475</b> | 1.6     | <b>11.6</b> | 2.5     |
| <i>fac</i> -[Re(CO) $_3$ 5MeSal-Tryp(Py)] <b>(3)</b>        | <b>21.76</b> | 1.3     | <b>28.37</b> | 1.7     | <b>12.01</b> | 1.9     | <b>20.7</b> | 2.9     |
| <i>fac</i> -[Re(CO) $_3$ 5MeSal-Tryp(Imi)] <b>(4)</b>       | <b>15.42</b> | 1.4     | <b>8.166</b> | 1.5     | <b>18.36</b> | 1.3     | <b>14.0</b> | 2.4     |
| <i>fac</i> -[Re(CO) $_3$ 5MeSal-Tryp(PPh $_3$ )] <b>(5)</b> | <b>26.35</b> | 1.3     | <b>9.124</b> | 1.5     | <b>30.41</b> | 1.3     | <b>22.0</b> | 2.4     |
| <i>fac</i> -[Re(CO) $_3$ 5MeSal-Tryp(DMAP)] <b>(6)</b>      | <b>21.11</b> | 1.5     | <b>54.43</b> | 1.6     | <b>109.7</b> | 1.3     | <b>61.7</b> | 2.5     |
| <i>fac</i> -[Re(CO) $_3$ 5MeSal-Tryp] $_2$ <b>(7)</b>       | <b>48.31</b> | 1.7     | <b>2.613</b> | 1.5     | <b>29.75</b> | 1.3     | <b>26.9</b> | 2.6     |

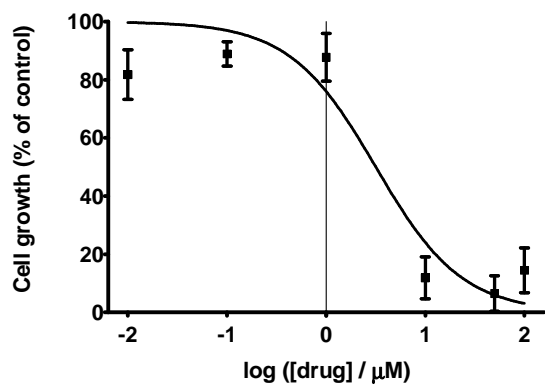

Figure CT.1: Graphical representation of the IC50 curve for Cisplatin.

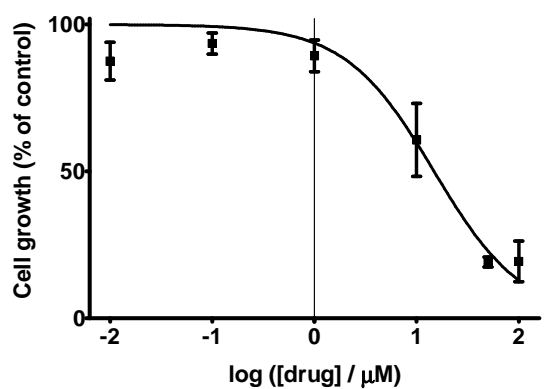

Figure CT.2: Graphical representation of the IC50 curve for 5MeSal-Tryptamine (1).

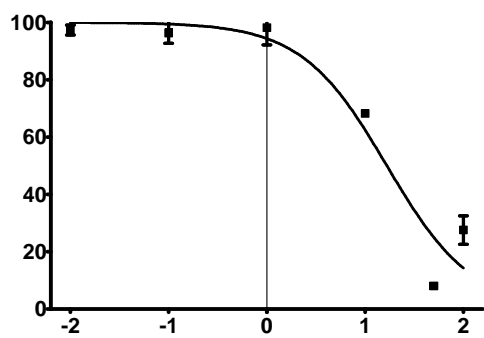

Figure CT.3: Graphical representation of the IC50 curve for *fac*-[Re(CO)<sub>3</sub>5MeSal-Tryp(MeOH)] (2).

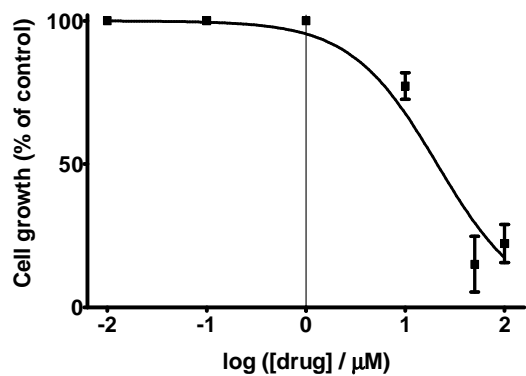

Figure CT.4: Graphical representation of the IC50 curve for *fac*-[Re(CO)<sub>3</sub>MeSal-Tryp(Py)] (3).

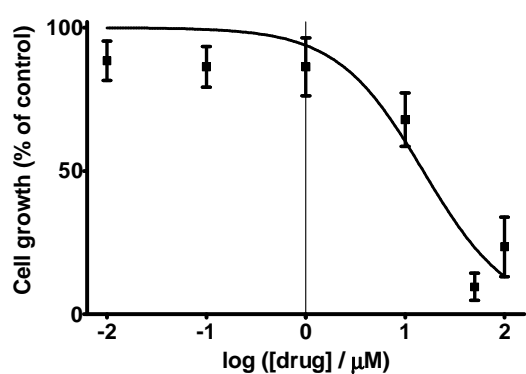

Figure CT.5: Graphical representation of the IC50 curve for *fac*-[Re(CO)<sub>3</sub>MeSal-Tryp(Imi)] (4).

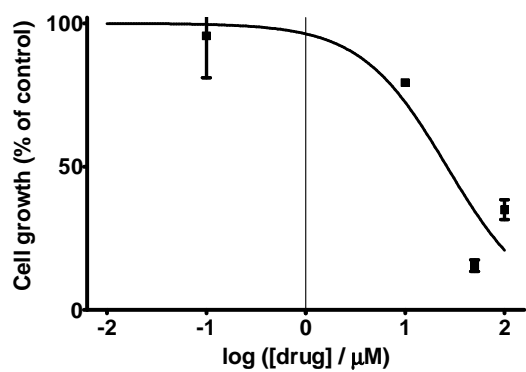

Figure CT.6: Graphical representation of the IC50 curve for *fac*-[Re(CO)<sub>3</sub>MeSal-Tryp(PPh<sub>3</sub>)] (5).

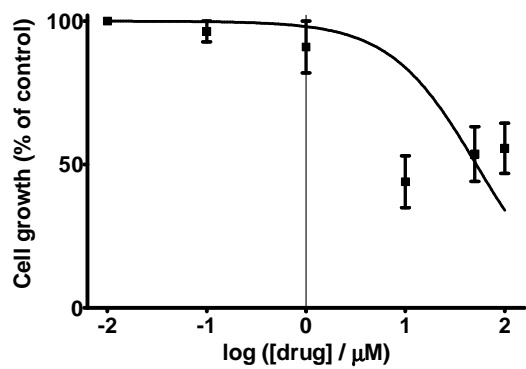

Figure CT.7: Graphical representation of the IC50 curve for *fac*-[Re(CO)<sub>3</sub>MeSal-Tryp(DMAP)] (6).

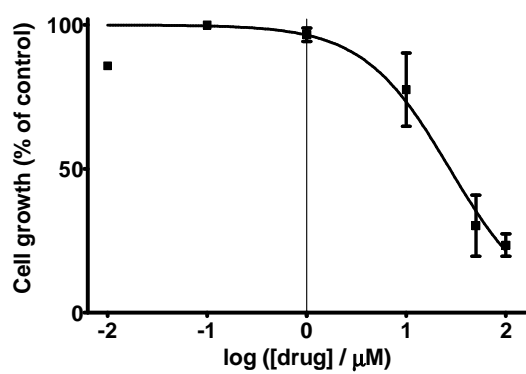

Figure CT.8: Graphical representation of the IC50 curve for *fac*-[Re(CO)<sub>3</sub>MeSal-Tryp]<sub>2</sub> (7).

PHOTOLUMINESCENCE:

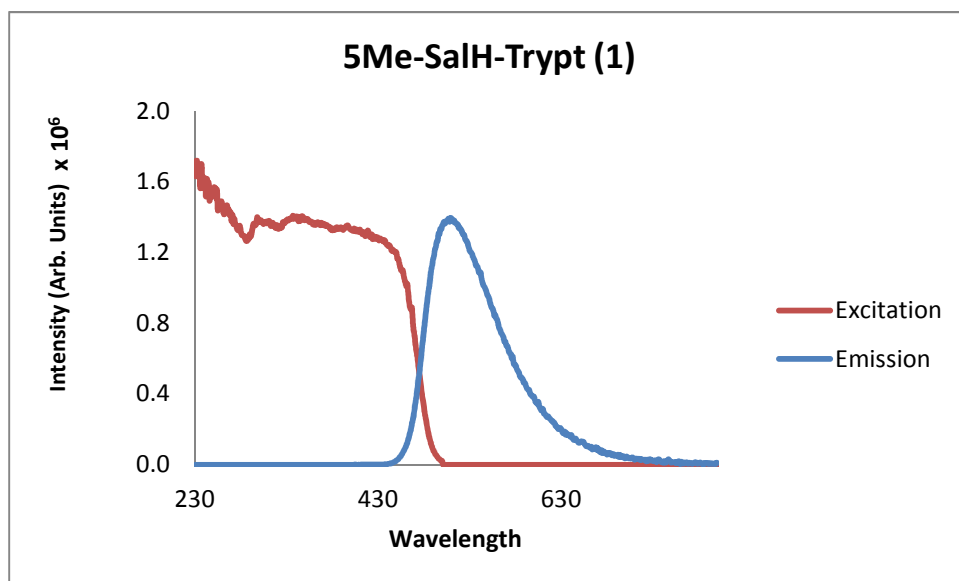

Figure PL.1: Excitation and emission graph of 5MeSalH-Tryptamine (1).

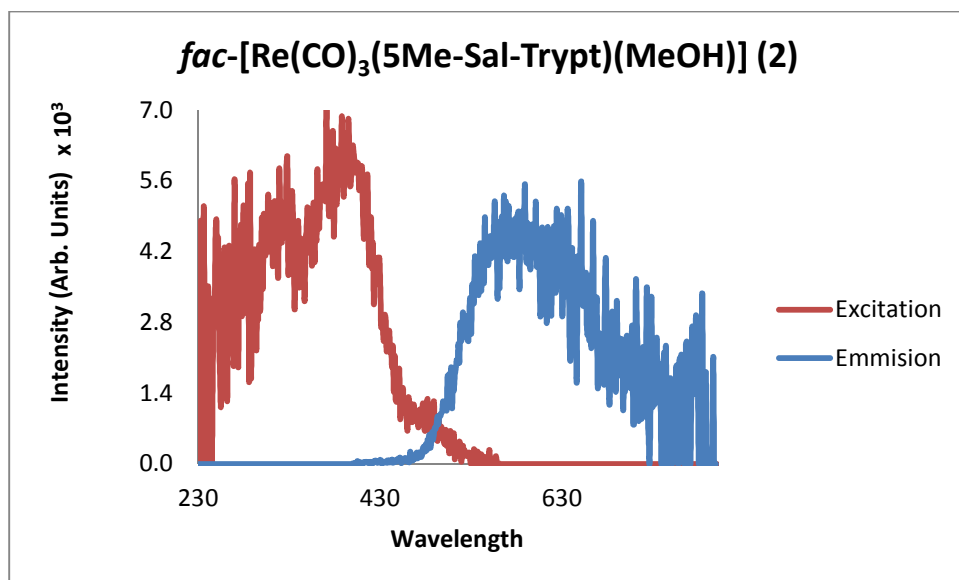

Figure PL.2: Excitation and emission graph of  $fac$ -[Re(CO)<sub>3</sub>(5Me-Sal-Trypt)(MeOH)] (2).

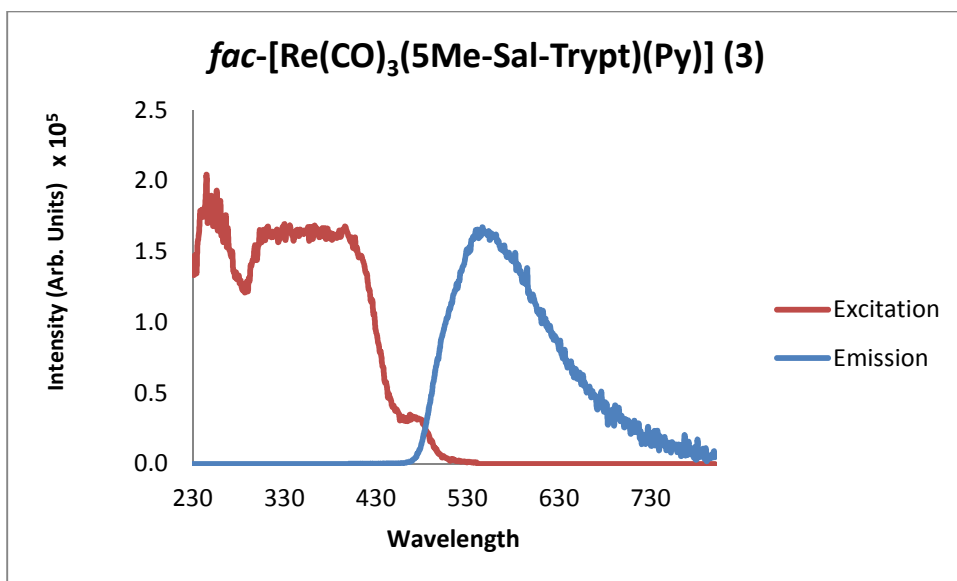

Figure PL.3: Excitation and emission graph of *fac*-[Re(CO)<sub>3</sub>(5Me-Sal-Trypt)(Py)] (3).

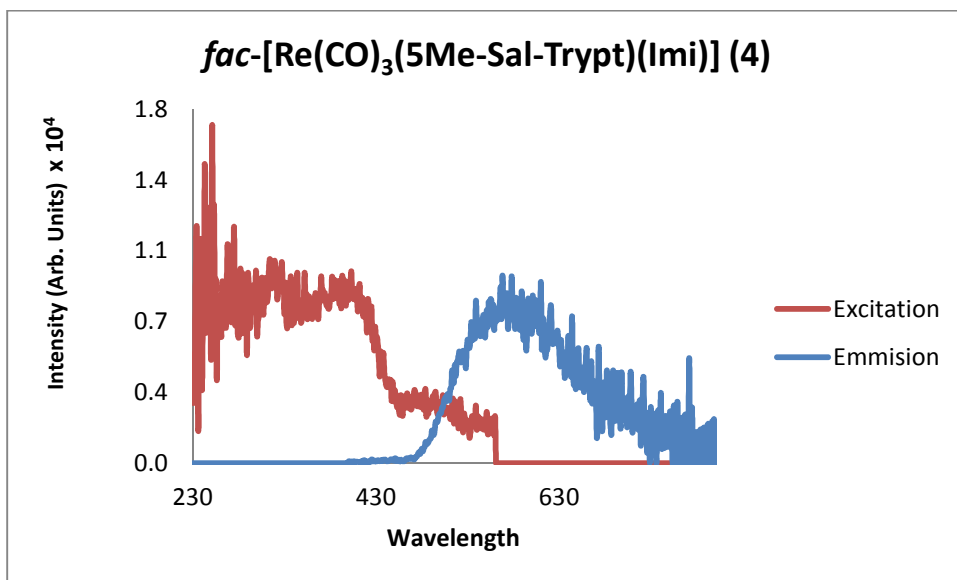

Figure PL.4: Excitation and emission graph of *fac*-[Re(CO)<sub>3</sub>(5Me-Sal-Trypt)(Imi)] (4).

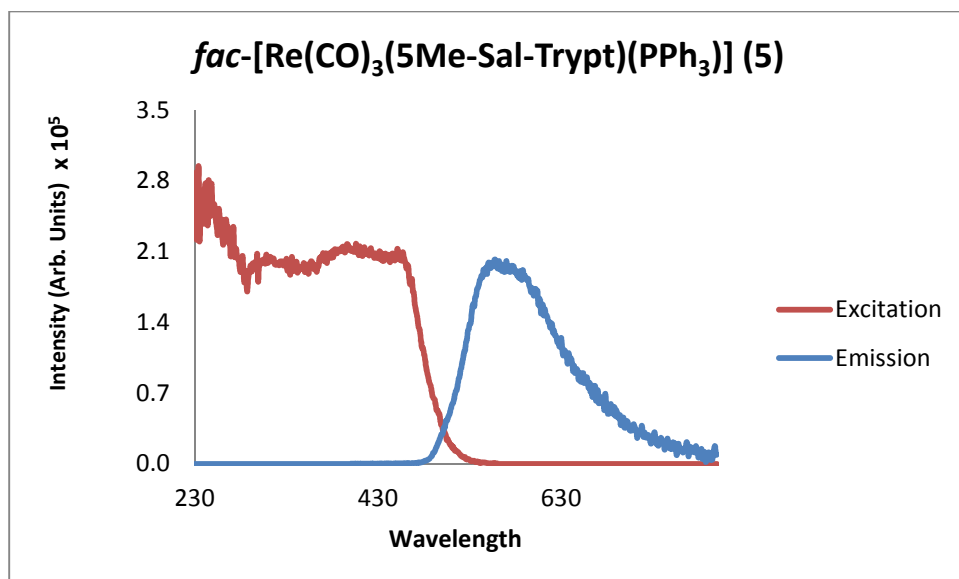

Figure PL.5: Excitation and emission graph of *fac*-[Re(CO)<sub>3</sub>(5Me-Sal-Trypt)(PPh<sub>3</sub>)] (5).

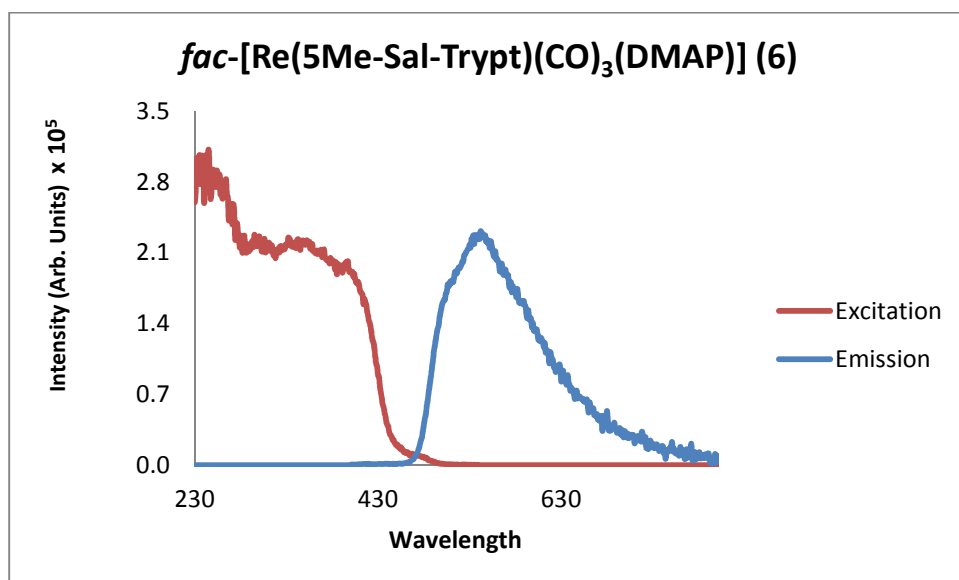

Figure PL.6: Excitation and emission graph of *fac*-[Re(CO)<sub>3</sub>(5Me-Sal-Trypt)(DMAP)] (6).



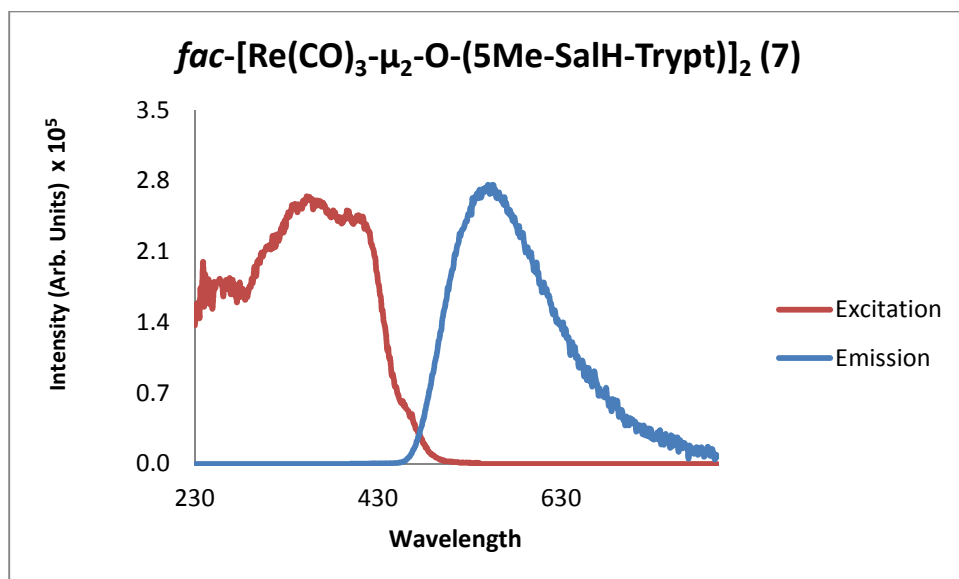

Figure PL.7: Excitation and emission graph of *fac*-[Re(CO)<sub>3</sub>-μ<sub>2</sub>-O-(5Me-SalH-Trypt)]<sub>2</sub> (7).

<sup>1</sup> A. Brink, H. G. Visser and A. Roodt, *J. Inorg. Chem.*, 2014, **53**, 12480–12488

<sup>2</sup> T.W. Swaddle, *Adv. Inorg. Bioinorg. Mech.* **1983**, *2*, 95-138.

<sup>3</sup> Wilkins, R.G. *Kinetics and Mechanism of Reactions of Transition Metal Complexes*, 2nd Ed., VCH Publishers, Inc., New York, USA, 2002
